# Supplementary material
Source: PubMed Central journal article supplement (PMC4790678)
Supplement: rony008126.ww1_default.pdf [file rony008126.ww1_default.pdf]

**Web appendix:** Web tables

Table A Study quality of included studies on egg consumption and risk of coronary heart disease (CHD)

| Reference             | Selection               |                       | Exposure ascertainment (validated FFQ questionnaires with unit of egg consumption) |                           | Comparability                                     |                                     | Outcome                |     | Overall quality |
|-----------------------|-------------------------|-----------------------|------------------------------------------------------------------------------------|---------------------------|---------------------------------------------------|-------------------------------------|------------------------|-----|-----------------|
|                       | Representative of cases | Selection of controls | No history of disease                                                              | Comparable on confounders | Outcome assessment (by medical record or doctors) | Adequate follow-up time (> 5 years) | Follow-up rate (> 80%) |     |                 |
| Hu et al, 1999        | 0                       | 1                     | 1                                                                                  | 2                         | 1                                                 | 1                                   | 1                      | 8   |                 |
| Nakamura et al, 2004  | 1                       | 1                     | 0.5                                                                                | 1                         | 1                                                 | 1                                   | 1                      | 7.5 |                 |
| Nakamura et al, 2006  | 1                       | 1                     | 0.5                                                                                | 1                         | 2                                                 | 1                                   | 1                      | 8.5 |                 |
| Qureshi et al, 2007   | 1                       | 1                     | 0.5                                                                                | 1                         | 1                                                 | 1                                   | 1                      | 7.5 |                 |
| Djousse et al, 2008   | 0                       | 1                     | 0.5                                                                                | 1                         | 2                                                 | 1                                   | 1                      | 7.5 |                 |
| Scrafford et al, 2011 | 1                       | 1                     | 0                                                                                  | 1                         | 2                                                 | 1                                   | 1                      | 8   |                 |

1 = "Yes", 0 = "No", "Unable to determine" or "Not available".

Table B Study quality of included studies on egg consumption and risk of stroke

| Reference             | Selection               |                       | Exposure ascertainment (validated FFQ questionnaires with unit of egg consumption) |                           | Comparability                                     |                                     | Outcome                |   | Overall quality |
|-----------------------|-------------------------|-----------------------|------------------------------------------------------------------------------------|---------------------------|---------------------------------------------------|-------------------------------------|------------------------|---|-----------------|
|                       | Representative of cases | Selection of controls | No history of disease                                                              | Comparable on confounders | Outcome assessment (by medical record or doctors) | Adequate follow-up time (> 5 years) | Follow-up rate (> 80%) |   |                 |
| Sauvaget et al, 2003  | 0                       | 1                     | 0.5                                                                                | 1                         | 1                                                 | 1                                   | 1                      | 1 | 6.5             |
| Nakamura et al, 2004  | 1                       | 1                     | 0.5                                                                                | 1                         | 1                                                 | 1                                   | 1                      | 1 | 7.5             |
| Qureshi et al, 2007   | 1                       | 1                     | 0.5                                                                                | 1                         | 1                                                 | 1                                   | 1                      | 1 | 7.5             |
| Djousse et al, 2008   | 0                       | 1                     | 0.5                                                                                | 1                         | 2                                                 | 1                                   | 1                      | 1 | 7.5             |
| Scrafford et al, 2011 | 1                       | 1                     | 0                                                                                  | 1                         | 2                                                 | 1                                   | 1                      | 1 | 8               |
| Bernstein et al, 2012 | 0                       | 1                     | 1                                                                                  | 1                         | 2                                                 | 1                                   | 1                      | 0 | 7               |

1 = "Yes", 0 = "No", "Unable to determine" or "Not available".

Table C Methods for adjustment for the included studies on coronary heart disease (CHD)

| Reference             | Statistical Model          | Risk Expression | Total CHD | CHD with diabetes | Male | Female | Fatal CHD |
|-----------------------|----------------------------|-----------------|-----------|-------------------|------|--------|-----------|
| Hu et al, 1999        | Pooled logistic regression | RR              | √         | √                 | √    | √      | √         |
| Nakamura et al, 2004  | Cox                        | RR              |           |                   | √    | √      | √         |
| Nakamura et al, 2006  | Cox                        | HR              | √         |                   |      |        |           |
| Qureshi et al, 2007   | Cox                        | RR              | √         | √                 |      |        |           |
| Djousse et al, 2008   | Cox                        | HR              | √         | √                 | √    |        |           |
| Scrafford et al, 2011 | Cox                        | HR              |           | √                 | √    | √      | √         |

Abbreviation: HR, hazard ratio; RR, relative risk.

Table D Methods for adjustment for the included studies on stroke

| Reference             | Statistical Model | Risk Expression | Total stroke | Stroke with diabetes | Male | Female | Hemorrhagic stroke | Ischemic stroke | Fatal stroke |
|-----------------------|-------------------|-----------------|--------------|----------------------|------|--------|--------------------|-----------------|--------------|
| Sauvaget et al, 2003  | Cox               | HR              |              |                      | √    | √      | √                  | √               | √            |
| Nakamura et al, 2004  | Cox               | RR              |              |                      | √    | √      |                    |                 | √            |
| Qureshi et al, 2007   | Cox               | RR              | √            | √                    |      |        |                    | √               |              |
| Djousse et al, 2008   | Cox               | HR              | √            | √                    | √    |        | √                  | √               |              |
| Scrafford et al, 2011 | Cox               | HR              |              | √                    | √    | √      |                    |                 | √            |
| Bernstein et al, 2012 | Cox               | RR              | √            |                      | √    | √      | √                  | √               |              |

Abbreviation: HR, hazard ratio; RR, relative risk.
